# Supplementary material for: A genome-wide CRISPR/Cas9 screen identifies calreticulin as a selective repressor of ATF6α
Source: eLife journal article supplement (doi:10.7554/elife.96979), 2024-05-02

Uncropped and labelled gels for (Figure 2)

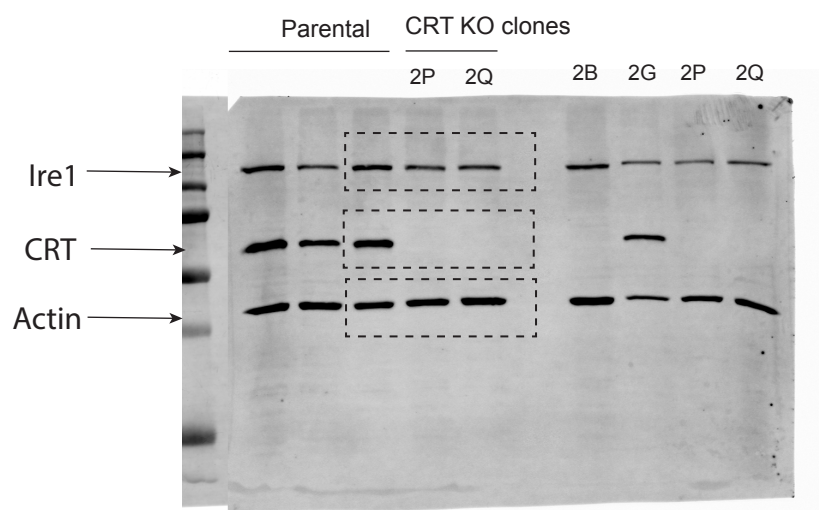

blot from Ire1  
showing also previous blottings  
for CRT and Actin

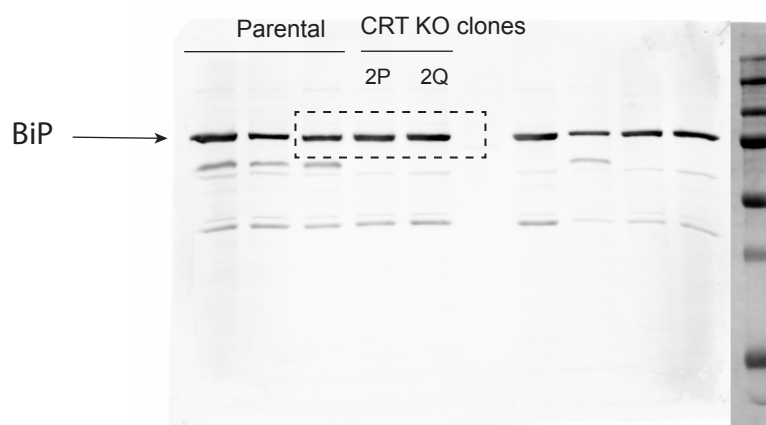

Supplement: fig2-data1 [file elife-96979-fig2-data1-v1.zip]
