# Supplementary figures and images for: A genome-wide CRISPR/Cas9 screen identifies calreticulin as a selective repressor of ATF6α
Source: eLife journal article supplement (doi:10.7554/elife.96979), 2024-05-02

03.05.2024 Uncropped and labelled blots for figure 1, supplement 1

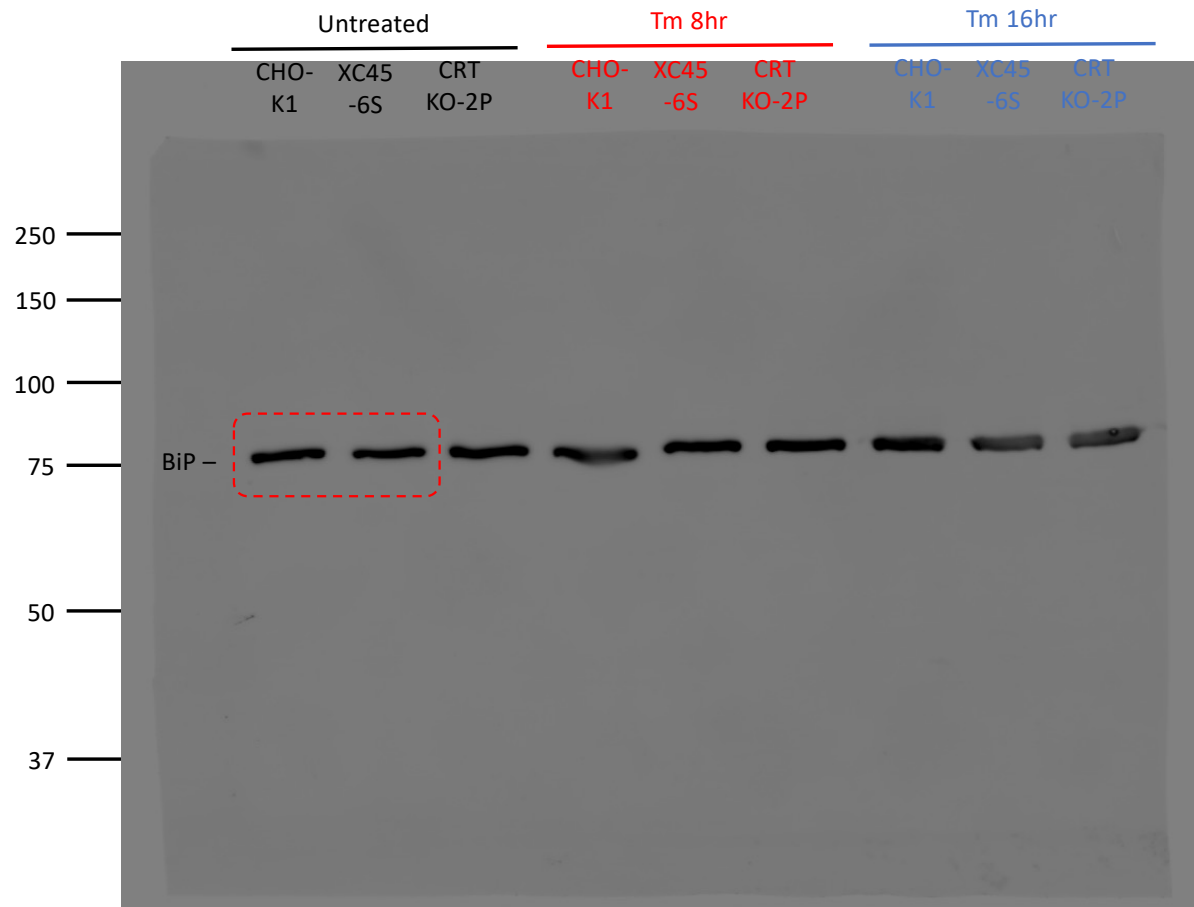

03.05.24 BiP Chicken, IR800

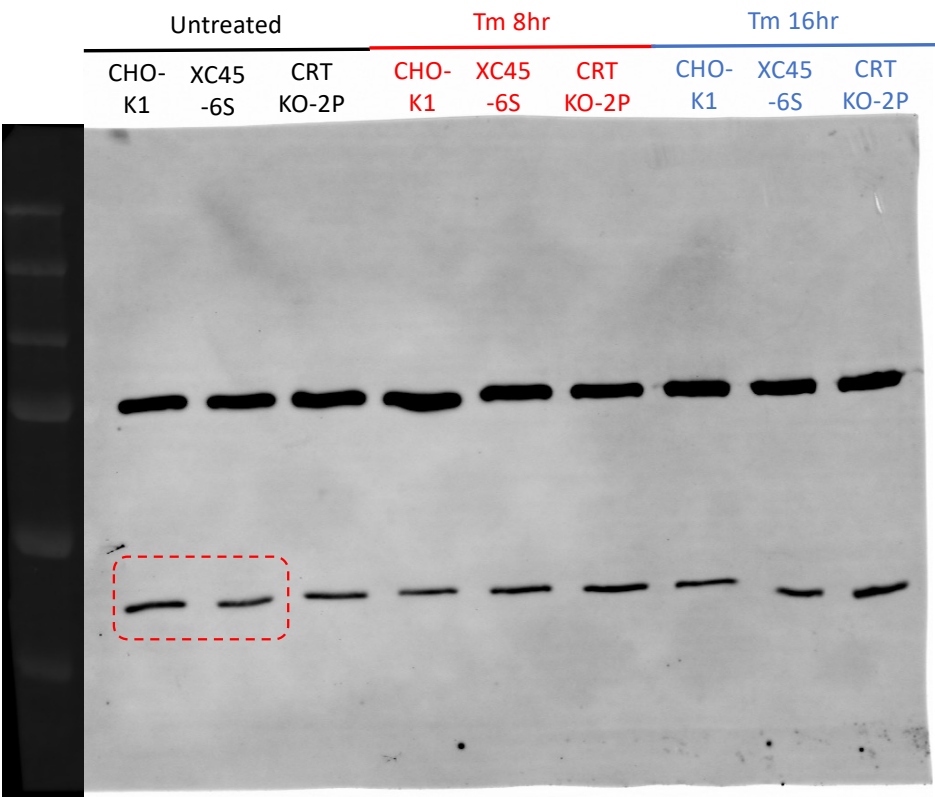

07.05.24 Actin Mouse, IR800

Supplement: fig1-figsupp1-data1 [file Uncrooped and labeled blots for Figure 1_figure supplement 1.pdf › Figure 1_ figure supplement 1_source data/Uncrooped and labeled blots for Figure 1_figure supplement 1.pdf]

Uncropped and labelled gels for (Figure 1-figure supplement 4)

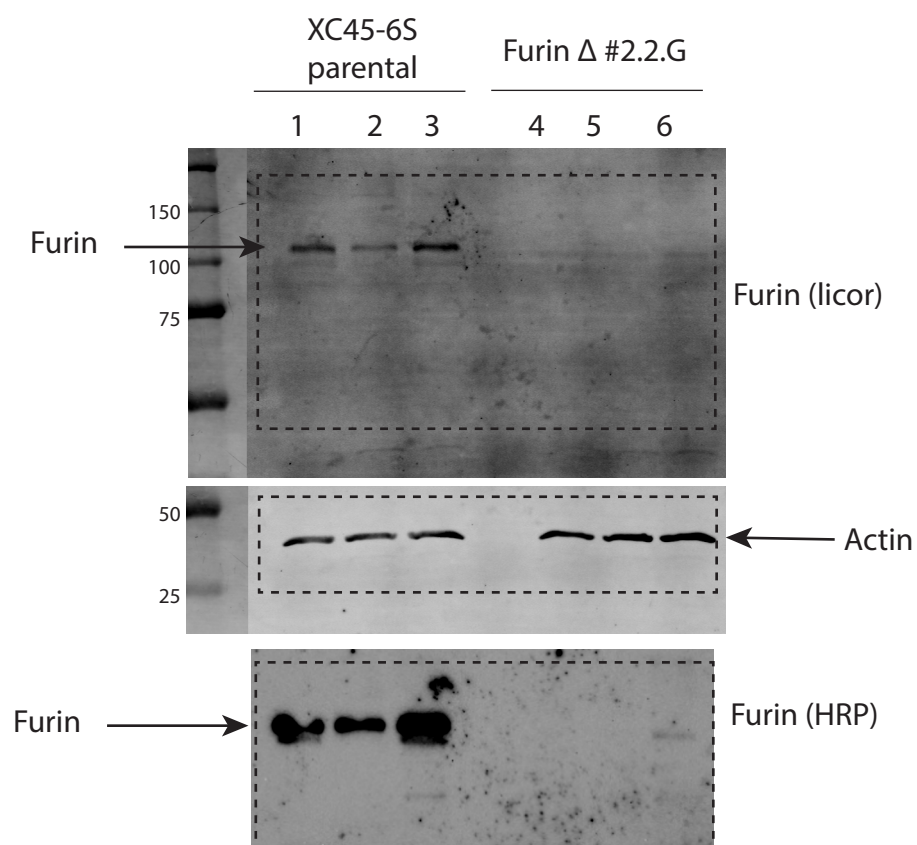

Supplement: fig1-figsupp4-data1 [file Uncropped and labelled gels for (Figure 1-figure supplement 4).pdf › Figure 1_figure supplement 4_source data/Uncropped and labelled gels for (Figure 1-figure supplement 4).pdf]

Uncropped and labelled gels for (Figure 2\_figure supplemental 1)

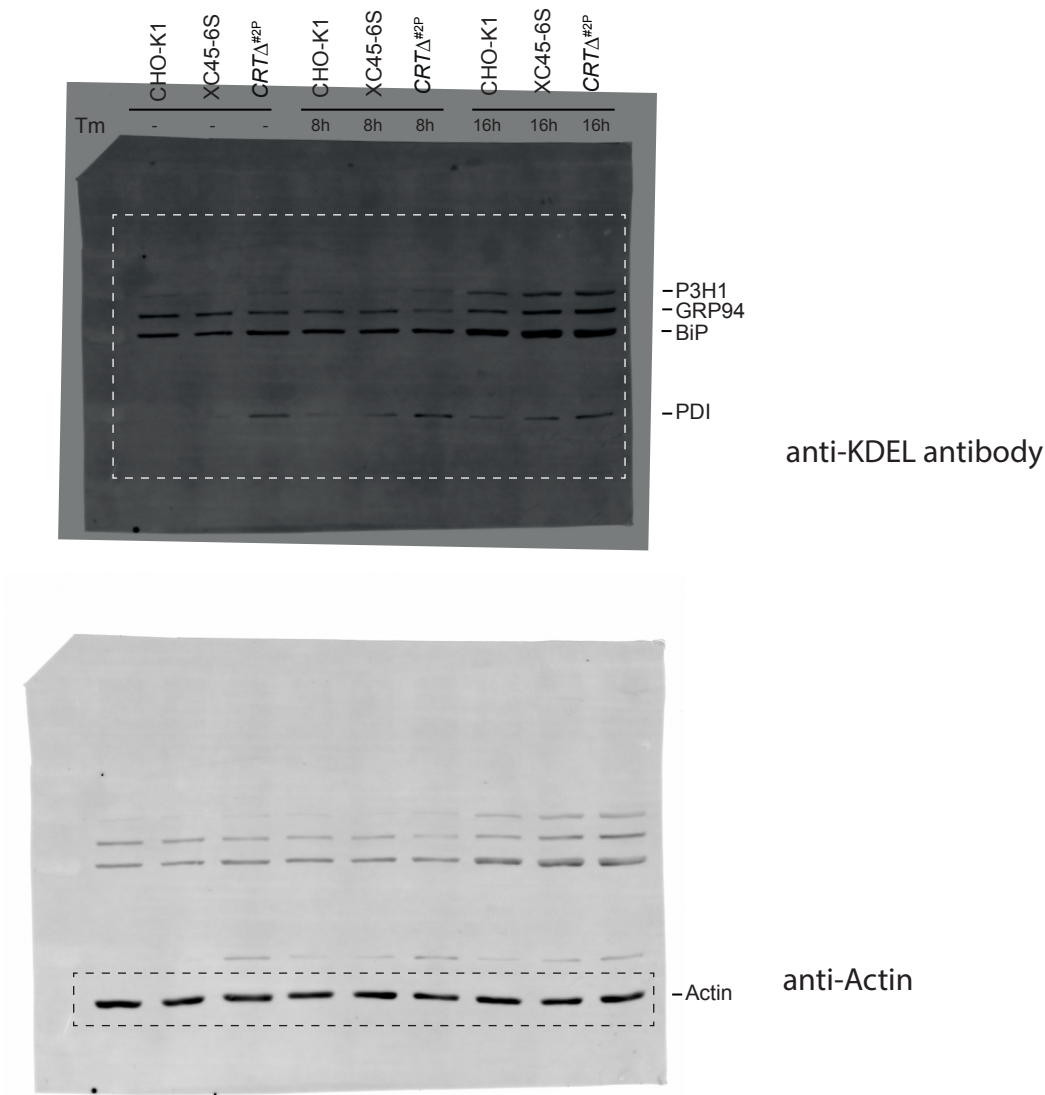

Supplement: fig2-figsupp1-data1 [file Uncropped and labelled gels for (Figure 2_figure supplement 1).pdf › Figure 2_figure supplement 1_source data /Uncropped and labelled gels for (Figure 2_figure supplement 1).pdf]

Uncropped and labelled gels for (Figure 2-figure supplement 2)

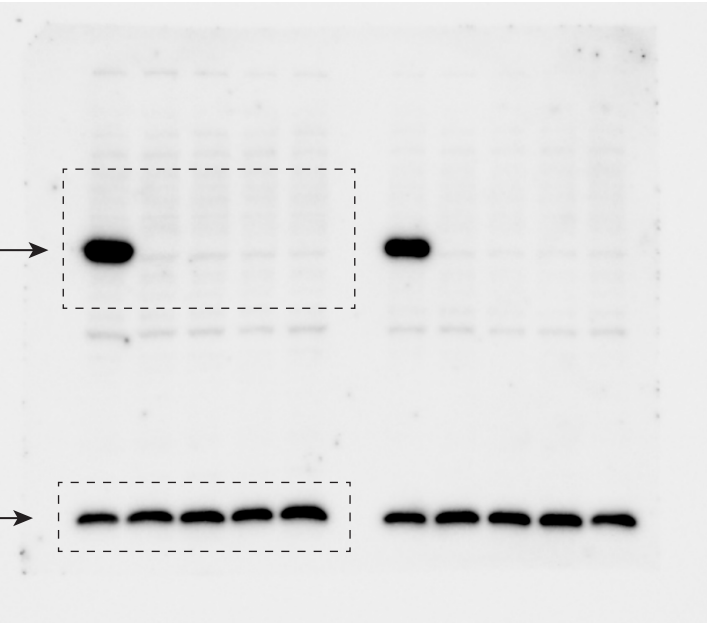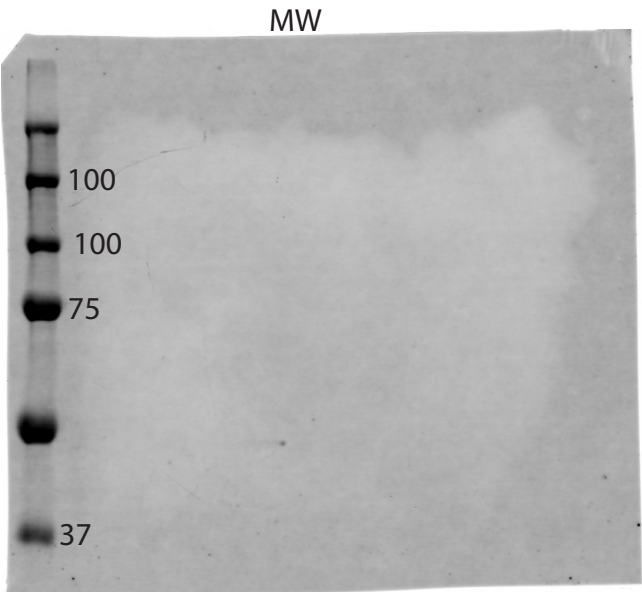

Supplement: fig2-figsupp2-data1 [file Uncropped and labelled gels for (Figure 2_figure supplement 2).pdf › Figure 2_figure supplement 2_source data /Uncropped and labelled gels for (Figure 2_figure supplement 2).pdf]

Uncropped and labelled gels for (Figure 3B.1)

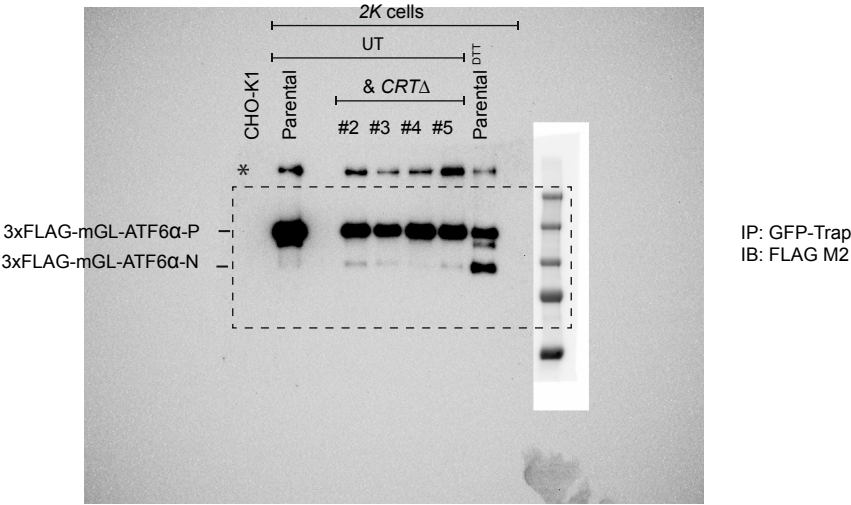

Uncropped and labelled gels for (Figure 3B.2)

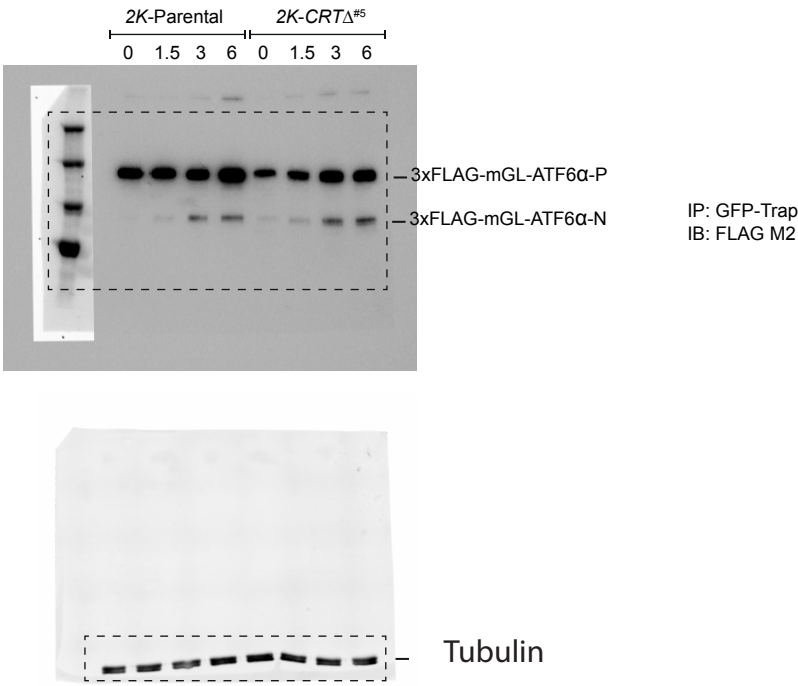

Supplement: fig3-data1 [file elife-96979-fig3-data1-v1.zip]

Uncropped and labelled gels for Figure 3\_figure supplement 1

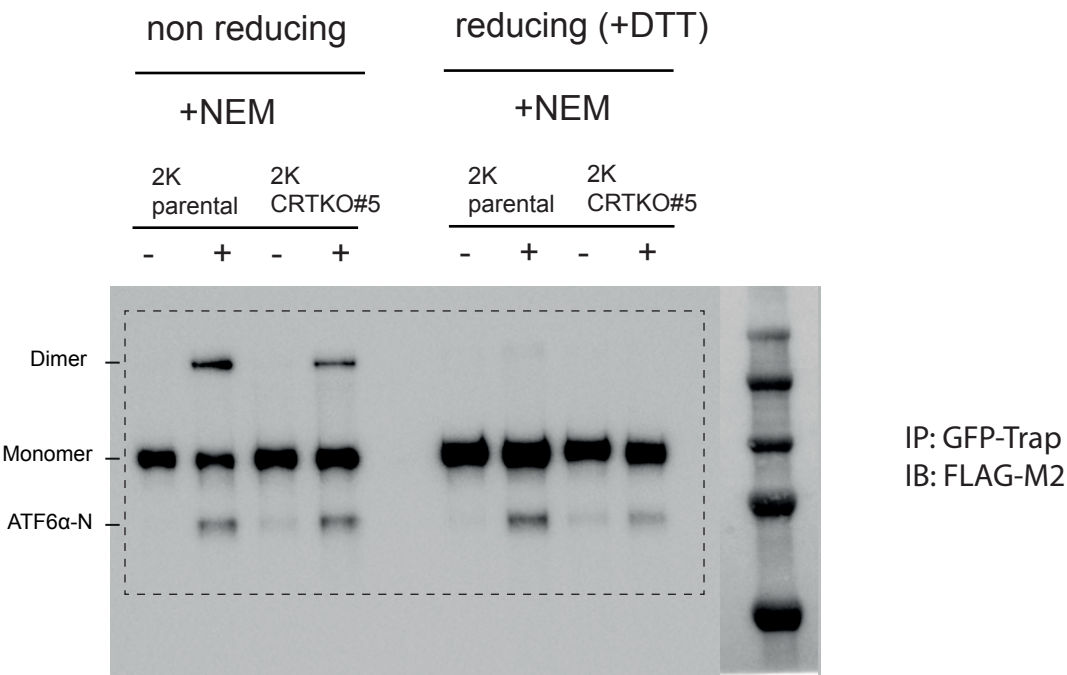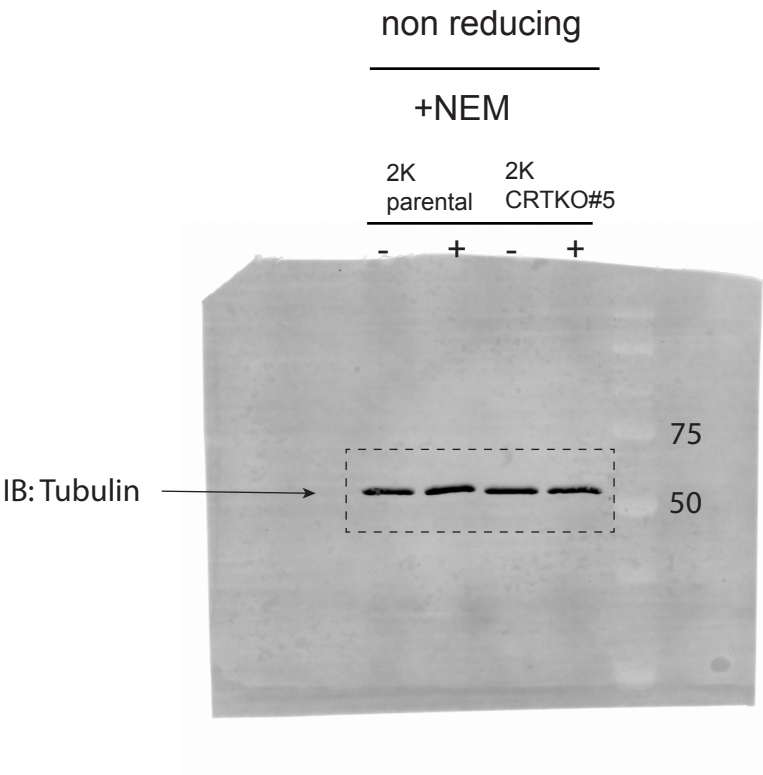

Supplement: fig3-figsupp1-code1 [file Uncropped and labelled gels for (Figure 3_figure supplement 1).pdf › Figure 3_figure supplement 1_source data /Uncropped and labelled gels for (Figure 3_figure supplement 1).pdf]

Uncropped and labelled gels for (Figure 4)

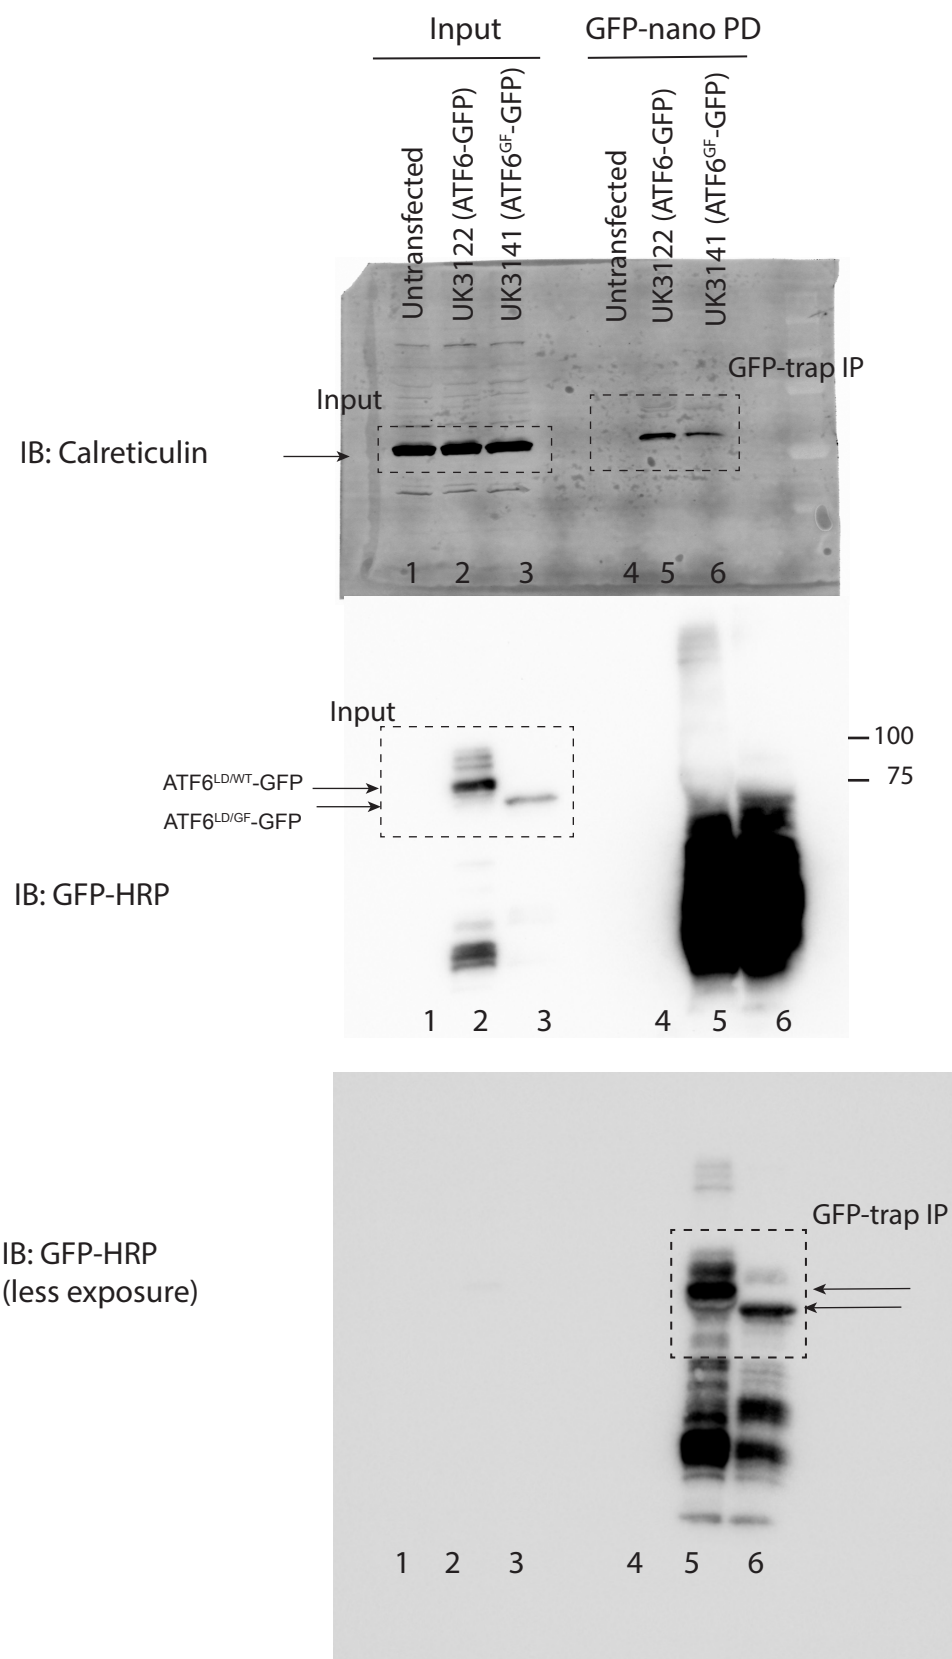

Supplement: fig4-data1 [file elife-96979-fig4-data1-v1.zip]

Uncropped and labelled gels for (Figure 4\_figure supplement 1)

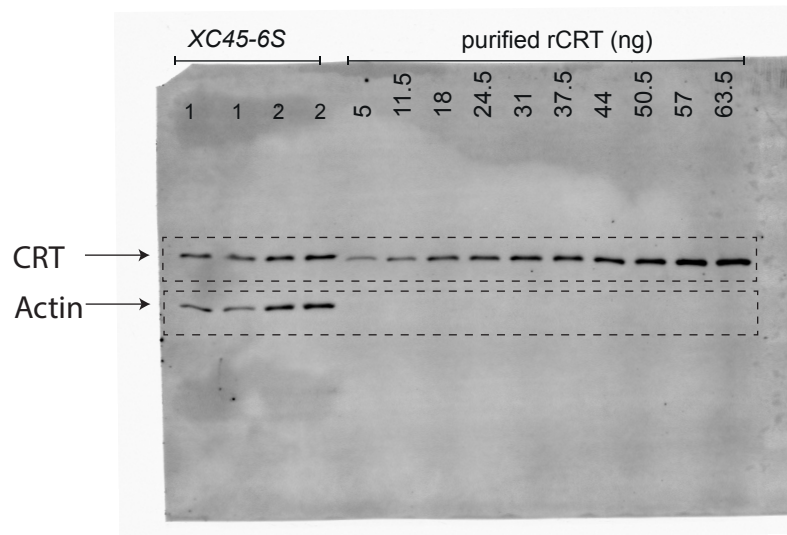

Supplement: fig4-figsupp1-data1 [file Uncropped and labelled gels for (Figure 4-figure supplement 1).pdf › Figure 4_figure supplement 1_source data/Uncropped and labelled gels for (Figure 4-figure supplement 1).pdf]

Uncropped and labelled gels for (Figure 6)

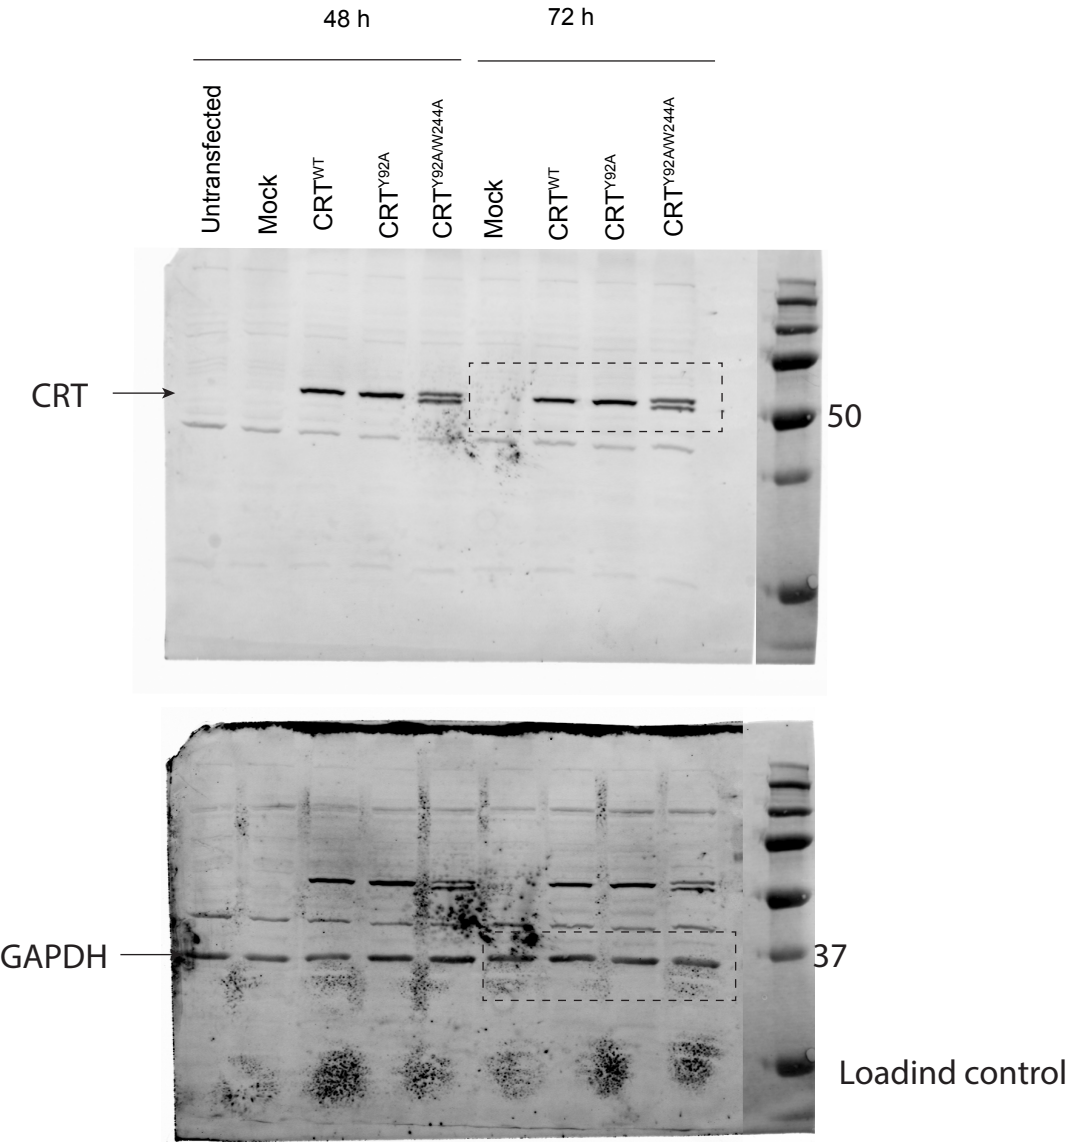

Supplement: fig6-data1 [file elife-96979-fig6-data1-v1.zip]

25. 04. 2023 Uncropped and labelled gel for Figure 7-A

Chemidoc\_  
Sybr Safe

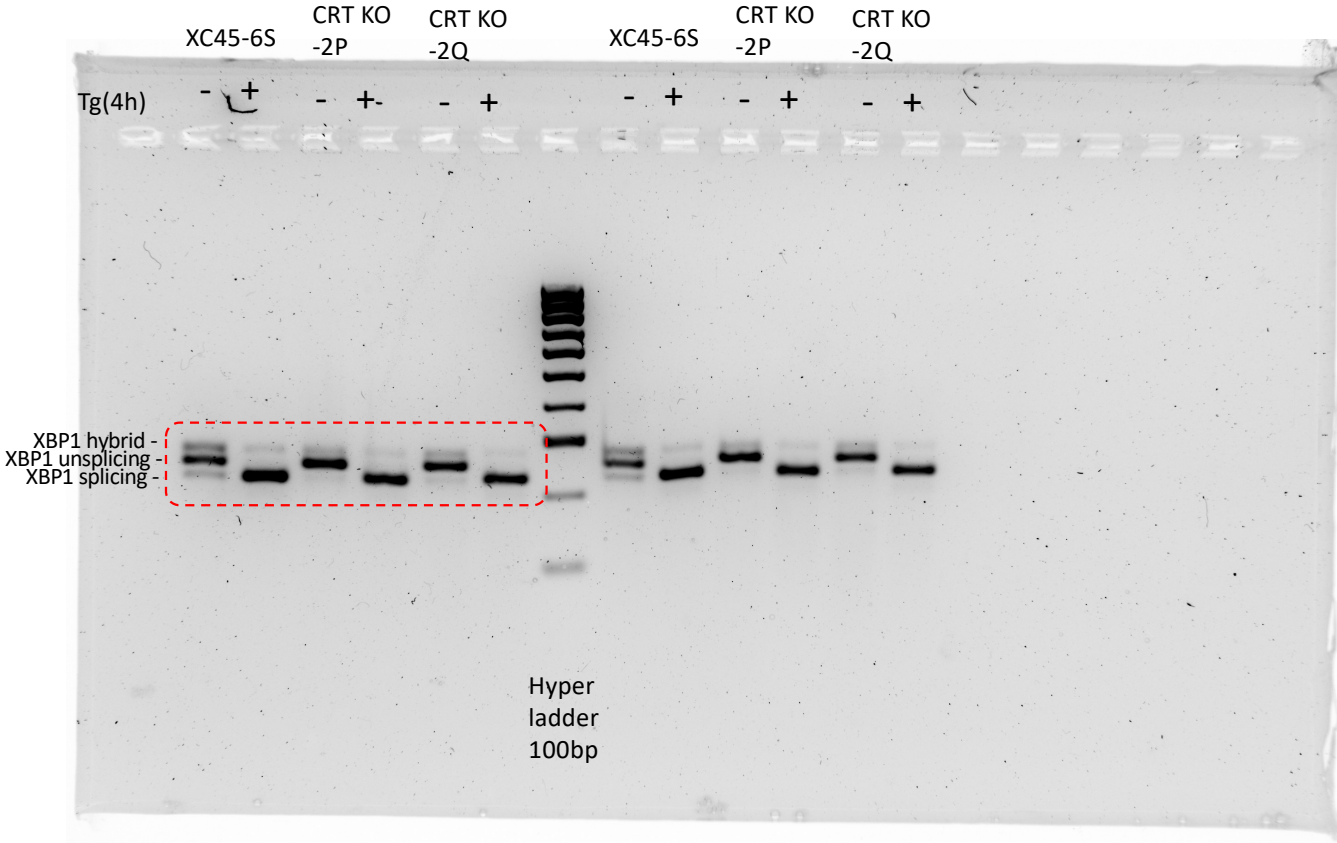

Supplement: fig7-data1 [file elife-96979-fig7-data1-v1.zip]

25. 07. 2023 Uncropped and labelled gel for Figure 7-B

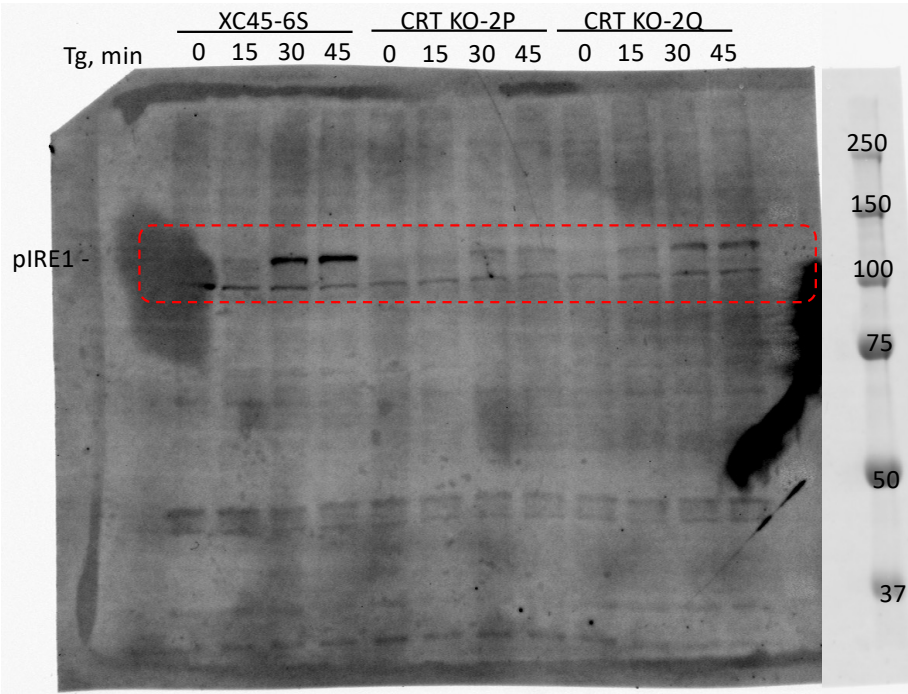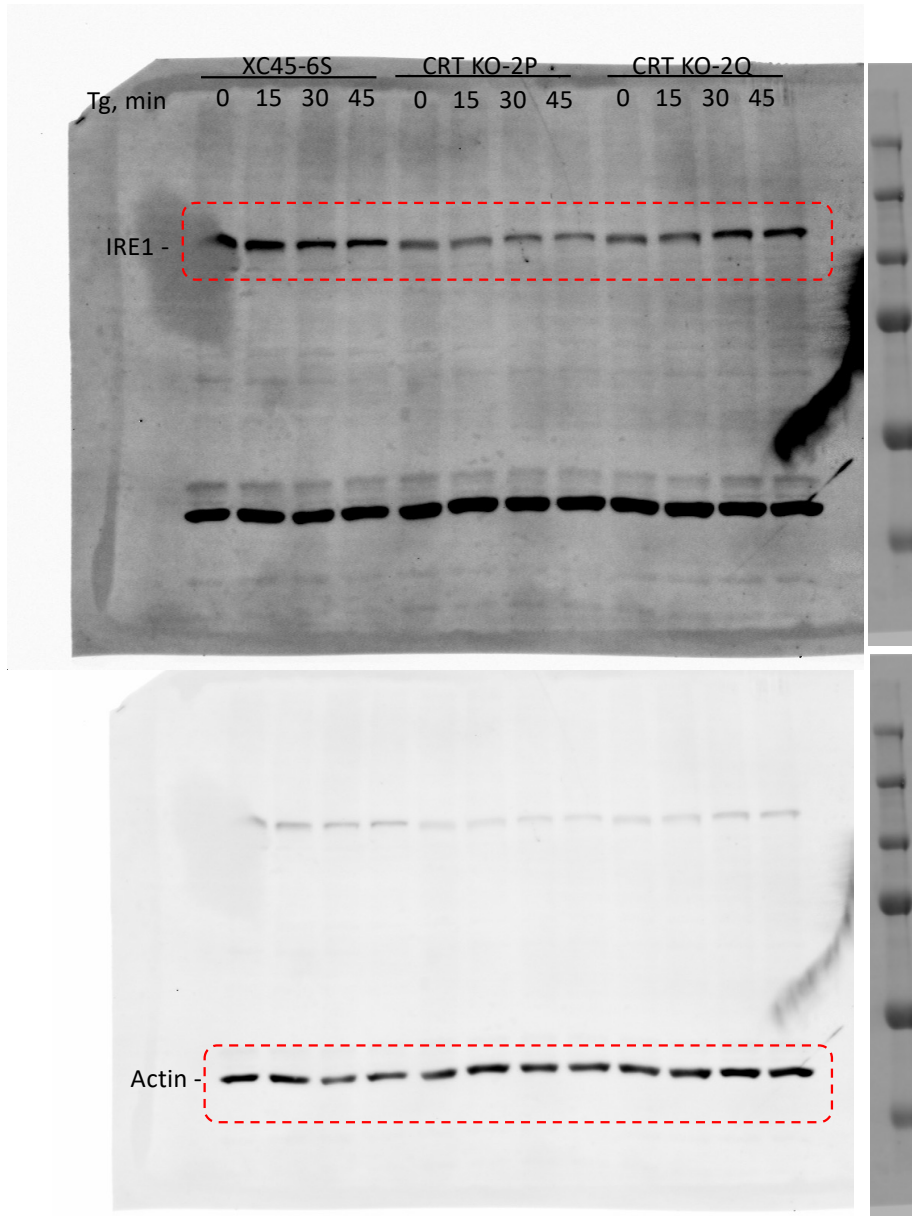

Supplement: fig7-data1 [file elife-96979-fig7-data1-v1.zip]
